# Supplementary material
Source: MDPI journal article supplement (https://www.mdpi.com/1424-2818/14/9/734)
Supplement: s1 [file s1]

**Supplementary material - File S1***Detailed method descriptions***1. Simulation of moose density per 1000 ha land area**

The program Helge is available for download at <https://simthinc.com/ladda-ner.html> (accessed: 2021-05-10) and was scientifically evaluated by Kalén (2018) and Kalén et al. (2022). It is a modern computer model developed for Swedish moose management. Via advanced simulations, the program assesses the complex dynamics of a moose population that is managed via hunting. Population size and development of moose populations as well as reproduction and the proportion of bulls in a population can be simulated.

Kalén, C., 2018. Simulating selective harvest and impact on age structure and harvest efficiency of moose in Sweden. *Alces* 54, 15–26.

Kalén, C., Andrén, H., Månsson, J., & Sand, H. (2022). Using citizen data in a population model to estimate population size of moose (*Alces alces*). *Ecological Modelling*, 471, 110066. <https://doi.org/https://doi.org/10.1016/j.ecolmodel.2022.110066>

**2. Extrapolation of deer density per 1000 ha land area**

To establish harvest data of roe deer, fallow deer, and red deer for each moose management area (MMA, in Swedish *Älgförvaltningsområde*), we used the proportional overlap of MMAs and hunting districts (in Swedish *Jaktvårdskrets*). We approximated that the harvest in each hunting district was proportional to its area represented within the MMA. In this way, data was aggregated to the common scale of MMAs using ArcMap (version 10.7.1).

**Supplementary material - File S2***Underlying correlation matrices and additional results of path analysis*

**Table S1.** Pearson's product moment correlations among used variables in the national model (144 MMAs).

|    |                     | V1        | V2        | V3        | V4        | V5        | V6       | V7        | V8        | V9 |
|----|---------------------|-----------|-----------|-----------|-----------|-----------|----------|-----------|-----------|----|
| V1 | Damaged pine        | 1         |           |           |           |           |          |           |           |    |
| V2 | Pine availability   | -0.41 *** | 1         |           |           |           |          |           |           |    |
| V3 | Pine forest         | -0.22 **  | 0.67 ***  | 1         |           |           |          |           |           |    |
| V4 | Agricultural land   | 0.13      | -0.50 *** | -0.59 *** | 1         |           |          |           |           |    |
| V5 | Preferred deciduous | 0.17 *    | -0.43 *** | -0.34 *** | 0.36 ***  | 1         |          |           |           |    |
| V6 | Young forest        | 0.06      | 0.40 ***  | 0.38 ***  | -0.47 *** | 0.01      | 1        |           |           |    |
| V7 | Snow days           | -0.30 *** | 0.63 ***  | 0.36 ***  | -0.61 *** | -0.46 *** | 0.12     | 1         |           |    |
| V8 | Moose density       | 0.11      | 0.26 **   | 0.41 ***  | -0.45 *** | 0.10      | 0.56 *** | 0.15      | 1         |    |
| V9 | Deer index          | 0.24 **   | -0.49 *** | -0.31 *** | 0.49 ***  | 0.18 *    | -0.25 ** | -0.64 *** | -0.29 *** | 1  |

\* $p < 0.05$ ; \*\* $p < 0.01$ ; \*\*\* $p < 0.001$

**Table S2.** Pearson's product moment correlations among used variables in the model for northern Sweden ( $n=68$ ).

|    |                   | V1       | V2       | V3 | V4 | V5 | V6 | V7 | V8 | V9 |
|----|-------------------|----------|----------|----|----|----|----|----|----|----|
| V1 | Damaged pine      | 1        |          |    |    |    |    |    |    |    |
| V2 | Pine availability | -0.39 ** | 1        |    |    |    |    |    |    |    |
| V3 | Pine forest       | -0.21    | 0.60 *** | 1  |    |    |    |    |    |    |

|    |                     |        |          |          |           |           |          |           |      |   |
|----|---------------------|--------|----------|----------|-----------|-----------|----------|-----------|------|---|
| V4 | Agricultural land   | 0.23   | -0.37 ** | -0.30 *  | 1         |           |          |           |      |   |
| V5 | Preferred deciduous | 0.19   | -0.32 ** | -0.30 *  | 0.32 **   | 1         |          |           |      |   |
| V6 | Young forest        | -0.04  | 0.46 *** | 0.54 *** | -0.05     | 0.34 **   | 1        |           |      |   |
| V7 | Snow days           | -0.18  | 0.24     | -0.14    | -0.71 *** | -0.41 *** | -0.36 ** | 1         |      |   |
| V8 | Moose density       | 0.21   | 0.05     | 0.17     | -0.01     | 0.49 ***  | 0.50 *** | -0.28 *   | 1    |   |
| V9 | Deer index          | 0.26 * | -0.39 ** | -0.09    | 0.84 ***  | 0.31 *    | 0.09     | -0.81 *** | 0.04 | 1 |

*\*p<0.05; \*\*p<0.01; \*\*\*p<0.001*

**Table S3.** Pearson's product moment correlations among used variables in the model for southern Sweden ( $n=76$ ).

|    |                     | V1      | V2       | V3        | V4        | V5       | V6       | V7      | V8      | V9 |
|----|---------------------|---------|----------|-----------|-----------|----------|----------|---------|---------|----|
| V1 | Damaged pine        | 1       |          |           |           |          |          |         |         |    |
| V2 | Pine availability   | -0.26 * | 1        |           |           |          |          |         |         |    |
| V3 | Pine forest         | -0.04   | 0.64 *** | 1         |           |          |          |         |         |    |
| V4 | Agricultural land   | -0.11   | -0.36 ** | -0.61 *** | 1         |          |          |         |         |    |
| V5 | Preferred deciduous | -0.09   | -0.04    | -0.06     | 0.16      | 1        |          |         |         |    |
| V6 | Young forest        | 0.25 *  | 0.29 *   | 0.17      | -0.59 *** | -0.10    | 1        |         |         |    |
| V7 | Snow days           | -0.08   | 0.37 *** | 0.30 **   | -0.29 *   | 0.18     | 0.28 *   | 1       |         |    |
| V8 | Moose density       | 0.18    | 0.39 *** | 0.52 ***  | -0.62 *** | -0.10    | 0.58 *** | 0.31 ** | 1       |    |
| V9 | Deer index          | 0.03    | -0.05    | -0.02     | 0.18      | -0.35 ** | -0.19    | -0.09   | -0.27 * | 1  |

*\*p<0.05; \*\*p<0.01; \*\*\*p<0.001*

**Table S4.** Unstandardized parameter estimates (est), corresponding standard errors (SE), outcomes of significance testing (Z- and  $p$  value), and standardized estimates (std. est) of the northern model. The table contains first estimates for the path coefficients, followed by covariance estimates between collaboration variables, and variance estimates for all endogenous variables. Estimates of indirect and total effects have been calculated, standard errors for these have been computed using the delta method.

| Variable                    | est    | SE     | Z-value | p value | std. Est |
|-----------------------------|--------|--------|---------|---------|----------|
| <b>Moose density</b>        |        |        |         |         |          |
| Pine forest                 | 5.000  | 4.586  | 1.090   | 0.276   | 0.166    |
| Agricultural land           | -3.826 | 3.084  | -1.241  | 0.215   | -0.100   |
| Preferred deciduous         | 7.383  | 1.910  | 3.865   | 0.000   | 0.485    |
| Young forest                | 30.641 | 18.168 | 1.687   | 0.092   | 0.244    |
| <b>Deer index</b>           |        |        |         |         |          |
| Agricultural land           | 14.011 | 3.451  | 4.059   | 0.000   | 0.484    |
| Young forest                | -6.776 | 5.860  | -1.156  | 0.248   | -0.072   |
| Snow days                   | -0.030 | 0.007  | -4.079  | 0.000   | -0.492   |
| <b>Damaged pine</b>         |        |        |         |         |          |
| Pine availability           | -0.001 | 0.000  | -2.490  | 0.013   | -0.348   |
| Pine forest                 | 0.002  | 0.122  | 0.017   | 0.987   | 0.003    |
| Moose density               | 0.007  | 0.003  | 2.782   | 0.005   | 0.271    |
| Deer index                  | 0.009  | 0.007  | 1.330   | 0.183   | 0.275    |
| Snow days                   | 0.000  | 0.000  | 0.950   | 0.342   | 0.198    |
| <b>Covariance</b>           |        |        |         |         |          |
| Moose density ~~ Deer index | -0.301 | 0.193  | -1.559  | 0.119   | -0.166   |

|                                         |        |       |        |       |        |  |
|-----------------------------------------|--------|-------|--------|-------|--------|--|
| <b>Variance</b>                         |        |       |        |       |        |  |
| Moose density ~ Moose density           | 4.189  | 1.198 | 3.496  | 0.000 | 0.612  |  |
| Deer index ~ Deer index                 | 0.786  | 0.171 | 4.603  | 0.000 | 0.202  |  |
| Damaged pine ~ Damaged pine             | 0.004  | 0.001 | 3.907  | 0.000 | 0.791  |  |
| <b>Indirect effects on damaged pine</b> |        |       |        |       |        |  |
| Pine forest via Moose density           | 0.035  | 0.032 | 1.080  | 0.280 | 0.045  |  |
| Agricultural land via Moose density     | -0.027 | 0.023 | -1.145 | 0.252 | -0.027 |  |
| Preferred deciduous via Moose density   | 0.052  | 0.020 | 2.621  | 0.009 | 0.131  |  |
| Young forest via Moose density          | 0.214  | 0.160 | 1.337  | 0.181 | 0.066  |  |
| Agricultural land via Deer index        | 0.132  | 0.117 | 1.130  | 0.259 | 0.133  |  |
| Young forest via Deer index             | -0.064 | 0.068 | -0.935 | 0.350 | -0.020 |  |
| Snow days via Deer index                | 0.000  | 0.000 | -1.335 | 0.182 | -0.135 |  |
| <b>Total effects</b>                    |        |       |        |       |        |  |
| Pine forest                             | 0.037  | 0.128 | 0.290  | 0.772 | 0.047  |  |
| Snow days                               | 0.000  | 0.000 | 0.451  | 0.652 | 0.063  |  |

Note: Parameter estimates for the southern model are not presented, as fit indices showed that our hypothesized model does not fit well to the southern dataset.
